# Supplementary material for: Complexity of implementing canine visceral leishmaniasis control measures at a population level: use of impregnated deltamethrin collars and culling
Source: Research Square preprint supplement (doi:10.21203/rs.3.rs-7427065/v1), 2025-09-12
Supplement: Supplementary file 1 [file 18e74efc689738aa2861a876.docx]

**Table 3:** *Leishmania infantum* seroinfection in humans and dogs at the onset of the study.

| **Area** | **Species** | **Serology** | | **Total** | **P value** | **OR¹ (95% CI²)** | **COR³ (CI 95%)** |
| --- | --- | --- | --- | --- | --- | --- | --- |
| + | - |  |
| Control | Dogs | 315 | 1287 | 1602 | <0.0001 | 1.459 (1.117, 1.906) | 1.776 (1.441, 2.189) |
| Humans | 80 | 477 | 557 |
| Intervention | Dogs | 127 | 1144 | 1271 | 0.0055 | 2.405 (1.720, 3.363) |
| Humans | 51 | 1105 | 1156 |
|  | ¹odds ratio; ²confidence interval; ³common odds ratio | | | | | | | |
