# Supplementary material for: Complexity of implementing canine visceral leishmaniasis control measures at a population level: use of impregnated deltamethrin collars and culling
Source: Research Square preprint supplement (doi:10.21203/rs.3.rs-7427065/v1), 2025-09-12
Supplement: Supplementary file 2 [file 402051a2d665b8b31ea367b1.docx]

Table S2. Percentage of dogs culled in the control and intervention areas over time.

| **Areas** | **VL dogs** | **T0** | **VL dogs** | **6-months** | **VL dogs** | **12-months** |
| --- | --- | --- | --- | --- | --- | --- |
| **Control** | 315 | 33.9% | 217 | 49.7% | 171 | 19.3% |
| **Intervention** | 127 | 85.0% | 82 | 46.3% | 125 | 30.4% |
