# Supplementary material for: Complexity of implementing canine visceral leishmaniasis control measures at a population level: use of impregnated deltamethrin collars and culling
Source: Research Square preprint supplement (doi:10.21203/rs.3.rs-7427065/v1), 2025-09-12
Supplement: Supplementary file 3 [file 6df644bdb1efda046f3e7dda.docx]

**Table 5:** Coefficients from the household infestation (*Lu. Longipalpis*) analysis, adjusted using a linear model with the dummy variable.

|  | Estimate | Std Error | t-value | p-value |
| --- | --- | --- | --- | --- |
| Intercept | 30.2632 | 6.9578 | 4.350 | 6.24e-05 *** |
| Households without dogs from the Intervention vs households from the Control area | 21.1696 | 6.7723 | 3.126 | **0.002875 **** |
| Households with dogs from Intervention area vs Control area | 5.6433 | 6.7723 | 0.833 | 0.408420 |
| Households with dogs vs Household with dogs with collars from the Intervention area | -15.5263 | 7.5007 | -2.070 | **0.04590** * |
| Time | 1.8041 | 0.5048 | 3.574 | **0.000759 ***** |

Significant codes: 0 ‘***’ 0.001 ‘**’ 0.01 ‘*’ 0.05 ‘.’ 0.1 ‘ ’ 1

Residual standard error: 20.87 on 53 degrees of freedom

Multiple R-squared: 0.305, Adjusted R-squared: 0.2656

F-statistic: 7.752 on 3 and 53 DF, p-value: 0.00022

Ten CDC light traps were placed monthly, for 18 months, in the intervention and control areas, withing the intervention area 5 CDC light traps were placed in dogs with collars and 5 without any dogs in the household. Household without dogs from the intervention area had more sand flies trapped than the control area.

Household without dogs in the same intervention area had more sand flies than in the areas with collared dogs.
