# Supplementary material for: Complexity of implementing canine visceral leishmaniasis control measures at a population level: use of impregnated deltamethrin collars and culling
Source: Research Square preprint supplement (doi:10.21203/rs.3.rs-7427065/v1), 2025-09-12
Supplement: Supplementary file 4 [file 74aad524f7006789c957898b.docx]

**Table 2:** Effectiveness of collars impregnated with 4% deltamethrin at 6, 12 and 27 months.

| Time (months) | intervention (**Int**) Control (**Cont**) | Anti Leishmania serology | | | | | OR | P value | **Euthanized dogs (%)** |
| --- | --- | --- | --- | --- | --- | --- | --- | --- | --- |
| | Positive |  | | --- | --- | | | Negative | | Total |  |  | |
| **0** | **Int** | 127 | 1144 | | 1271 | | 0.454 (0.364, 0.566) | <0.0001 | 92/127 (72%) |
| **Cont** | 315 | 1287 | | 1602 | | 107/315 (34%) |
| **6** | **Int** (Global sample) | 82 | 1207 | | 1289 | | 0.448 (0.343, 0.584) | <0.0001 | 38 (46.3%) |
| **Cont** (Global sample) | 217 | 1430 | | 1647 | | 108 (49.7%) |
| **Int** (New Recuitment) | 52 | 690 | | 742 | | 0.514 (0.368, 0.717) | <0.0001 | 24 (46.0%) |
| **Cont** (New Recuitment) | 139 | 948 | | 1087 | | 71 (51.0%) |
| **Int** (follow-up t0) | 30 | 539 | | 547 | | 0.344 (0.222, 0.533) | <0.0001 | 14(46.7%) |
| **Cont** (follow-up t0) | 78 | 482 | | 560 | | 37 (47.4%) |
| **12** | **Int** (Global sample) | 125 | 1005 | | 1130 | | 0.970 (0.760, 1.239) | 0.8092 | 38 (30.4%) |
| **Cont** (Global sample) | 171 | 1334 | | 1505 | | 33 (19.3%) |
| **Int** (New Recuitment) | 67 | 432 | | 499 | | 1.218 (0.876, 1.694) | 0.2411 | 22 (32.8%) |
| **Cont** (New Recuitment) | 102 | 801 | | 903 | | 19 (18.6%) |
| **Int** (follow-up t0) | 27 | 305 | | 332 | | 0.735 (0.426, 1.269) | 0.2687 | 0 (0%) |
| **Cont** (follow-up t0) | 30 | 249 | | 279 | | 7 (23.3%) |
| **Int** (follow-up t6) | 31 | 268 | | 299 | | 0.842 (0.511, 1.389) | 0.5014 | 16 (51.6%) |
| **Cont** (follow-up t6) | 39 | 284 | | 323 | | 7 (18%) |
| **27** | **Int** (Global sample) | 179 | 884 | | 1063 | | 1.048 (0.847, 1.298) | 0.6647 | NA |
| **Cont** (Global sample) | 231 | 1196 | | 1427 | | 105 (45.4%) |
| **Int** (New Recuitment) | 127 | 534 | | 661 | | 1.259 (0.978, 1.620) | 0.0738 | NA |
| **Cont** (New Recuitment) | 174 | 921 | | 1095 | | 74 (42.5%) |
| **Int** (follow-up t0) | 14 | 165 | | 179 | | 0.636 (0.282, 1.434) | 0.2757 | NA |
| **Cont** (follow-up t0) | 12 | 90 | | 102 | | 6 (50.0%) |
| **Int** (follow-up t6) | 14 | 104 | | 118 | | 0.591 (0.277, 1.260) | 0.1731 | NA |
| **Cont** (follow-up t6) | 18 | 79 | | 97 | | 12 (66.7%) |
| **Int** (follow-up t12) | 24 | 81 | | 105 | | 1.163 (0.625, 2.165) | 0.6334 | NA |
| **Cont** (follow-up t12) | 27 | 106 | | 133 | | 13 (48.0%) |
| *for testing OR=1 | |  |  | |  | |  |  |  | | |

Collars were changed at 6 and 12 months after the onset of the study.
