# Supplementary material for: Complexity of implementing canine visceral leishmaniasis control measures at a population level: use of impregnated deltamethrin collars and culling
Source: Research Square preprint supplement (doi:10.21203/rs.3.rs-7427065/v1), 2025-09-12
Supplement: Supplementary file 5 [file ad9c3781c1f3aa2bc607c729.docx]

**Table 4:** Relative risk (RR) of *L. infantum* seroconversion in dogs at 6, 12 and 27 months.

| **Time†** | **Control** | **Intervention** | **p-value **** | **RR (I/C)***** |
| --- | --- | --- | --- | --- |
| **6-months follow up** | | | | |
| N (seronegative dogs in the previous time) | 432 | 454 |  |  |
| Dogs with DPP® seroconversion | 65 | 26 |  |  |
| Dogs with DPP® and ELISA seroconversion | 33 | 15 |  |  |
| Overall *L. infantum* seroconversion rate | 0.0764 | 0.0330 | **0.0044** | 0.4325 (0.2383, 0.7849) |
| **12-months follow up*** | | | | |
| N (seronegative dogs in the previous time) | 303 | 343 |  |  |
| Dogs with DPP® seroconversion | 54 | 66 |  |  |
| Dogs with DPP® and ELISA seroconversion | 29 | 20 |  |  |
| Overall *L. infantum* seroconversion rate | 0.0957 | 0.0583 | 0.0732 | 0.6092 (0.3521, 1.0542) |
| **27 months follow up** | | | | |
| N (seronegative dogs in the previous time)**** | 99 | 139 |  |  |
| Dogs with DPP® seroconversion | 40 | 26 |  |  |
| Dogs with DPP® and ELISA seroconversion | 10 | 5 |  |  |
| Overall *L. infantum* seroconvertion rate | 0.1010 | 0.0359 | **0.0418** | 0.3561 (0.1256, 1.0097) |

† Dogs followed from time 0 and that remained seronegative at each test in subsequent surveys were taken as a sampling base to check the seroconversion rate. Dogs lost throughout the longitudinal study were also left from the sample (N do not appear in the table).

* Last collar replacement was at 12 months of the beginning of the study.

**p-ELISA z-test comparing proportions between two independent groups (difference between Intervention and Control).

*** RR – Relative risk Intervention/Control and respective 95% confidence interval.

**** Dogs followed minus the ones loss to follow-up between 12 and 27 months and dogs that seroconverted to DPP® at 12 months.
