# Supplementary material for: Complexity of implementing canine visceral leishmaniasis control measures at a population level: use of impregnated deltamethrin collars and culling
Source: Research Square preprint supplement (doi:10.21203/rs.3.rs-7427065/v1), 2025-09-12
Supplement: Supplementary file 6 [file c71e4b8c14a79582411e631b.docx]

Table S1. Urban structure of the study area and dog population coverage.

|  | Intervention area | Control area | Total |
| --- | --- | --- | --- |
| Number of Blocks | 246 | 246 | 492 |
| Number of Houses | 7740 (100) | 8189 (100) | 15929 (100) |
| Houses studied (%) | 6362 (82.2) | 6068 (74.1) | 12430 (78) |
| Houses unavailable (%) | 1378 (17.8) | 2121 (25.9) | 3499 (22) |
| Estimated number of dogs* | 1600 (100) | 2000 (100) | 3600 (100) |
| Dogs studied (%) | 1271 (79.4) | 1602 (80.1) | 2873 (79.8) |
