# Supplementary material for: Complexity of implementing canine visceral leishmaniasis control measures at a population level: use of impregnated deltamethrin collars and culling
Source: Research Square preprint supplement (doi:10.21203/rs.3.rs-7427065/v1), 2025-09-12
Supplement: Supplementary file 7 [file f06cea9222bd26941d56064c.docx]

**Table 1:** Baseline characteristics of canine populations enrolled at the onset of the study.

| Variables | | Control area 1602 (% of total) | Intervention area 1271 (% of total) | p-value |
| --- | --- | --- | --- | --- |
| Male/Female | | 772/830 (48.2/51.8) | 651/620 (51.2/48.8) | 0.1151 |
| Age |  |  |  |  |
| < 6 months | | 195/1602 (12.2) | 151/1271 (11.9) | 0.8563 |
| 6 months -1 year | | 518/1602 (32.3) | 412/1271 (32.4) | 0.9953 |
| 2 to 5 years | | 799/1602 (49.9) | 600/1271 (47.2) | 0.1665 |
| >5 years† | | 90/1602 (5.6) | 108/1271 (8.5) | 0.0031 |
| Mixed/Pure breeds | | 1347/173 (88.6/11.4) | 945/281 (77.1/22.9) | <0.0001 |
| Birthplace local/Elsewhere | | 394/1072 (26.9/73.1) | 431/787 (35.4/64.6) | <0.0001 |
| Any vaccine/ no vaccines | | 995/526 (65.4/34.6) | 898/329 (73.2/26.8) | <0.0001 |
| Vacines (last 12 months) | |  |  |  |
| Rabies vaccine | | 926/1521 (60.9) | 831/1227 (67.7) | 0.0876 |
| DHLP -P vaccine†† | | 35/1521 (2.3) | 65/1227 (5.3) | <0.0001 |
| Antihelminthic given? (last 12 months) | | 868/610 (58.7/41.3) | 774/437 (63.9/36.1) | 0.0068 |
| Yes/No | |
| Tick repellant given? (last 12 months) | | 233/1275 (15.5/84.5) | 339/804 (29.7/70.3) | <0.0001 |
| Yes/No | |
| Signs or symptoms of VL | | 1082/328 (76.7/23.3) | 998/236 (80.9/19.1) | 0.0110 |
| No/Yes * | |

* Presence of at least one sign of canine VL: onicogryphosis, alopecia, exfoliative dermatitis, loss of weight, conjunctivitis, ulcer, lymphonoadenophathy.

† It indicates statistically significant differences between the control and intervention areas.

†† DHLLP-P: polyvalent vaccine against canine distemper virus, leptospirosis, parainfluenza, and infectious canine hepatitis
