# Supplementary material for: Complexity of implementing canine visceral leishmaniasis control measures at a population level: use of impregnated deltamethrin collars and culling
Source: Research Square preprint supplement (doi:10.21203/rs.3.rs-7427065/v1), 2025-09-12
Supplement: Supplementary file 8 [file fea8668505ec94877f45b08e.docx]

| Time  (months) | Area | Median z | Mean z | 3rd quartile | Outliers> | Outliers (*n*) | With spatial autocorrelation (%) | Without spatial autocorrelation (%) | Recurring outliers (%)* |
| --- | --- | --- | --- | --- | --- | --- | --- | --- | --- |
| 0 | Control | 0.17 | 0.31 | 0.39 | 0.79 | 23 | 18 (78.3) | 5 (21.7) | NA |
| 12 | Control | 0.12 | 0.17 | 0.20 | 0.37 | 26 | 18 (69.2) | 8 (30.8) | 2/23 (8.7) |
| 27 | Control | 0.15 | 0.21 | 0.23 | 0.41 | 30 | 19 (63.3) | 11 (36.7) | 2/26 (7.7) |
| 0 | Intervention | 0.13 | 0.18 | 0.18 | 0.31 | 32 | 24 (75) | 8 (25) | NA |
| 12 | Intervention | 0.14 | 0.19 | 0.19 | 0.3 | 32 | 27 (84.4) | 5 (15.6) | 6/32 (18.7) |
| 27 | Intervention | 0.15 | 0.19 | 0.21 | 0.34 | 22 | 15 (68.2) | 7 (31.8) | 7/32 (21.9) |

Table S4. Analysis of the blocks shown in Figure 3 indicating fluctuation of the mean of canine L. infantum infection and presence of outliers blocks throughout the study period.
