# Supplementary material for: Complexity of implementing canine visceral leishmaniasis control measures at a population level: use of impregnated deltamethrin collars and culling
Source: Research Square preprint supplement (doi:10.21203/rs.3.rs-7427065/v1), 2025-09-12
Supplement: Supplementary file 9 [file fefa8624c9d937ab14c953ad.docx]

Table S3. Incidence rate and causes of Deltamethrin-impregnated collar loss among the 547 dogs followed at the first 6 months* among dogs monitored over a six-month period.

| Cause of loss of collars | Loss of collars  222 (40.6%) of 547 (100%) |
| --- | --- |
| Adverse reactions** | 21 (9.4) |
| Lost during dog play or fighting | 88 (39.6) |
| Owner's decision | 26 (11.7) |
| Other causes | 7 (3.1) |
| Not known | 80 (36) |

* Of the 1271 dogs recruited at the onset of the study in the intervention area, 92 (7.2%) were euthanized, but only 547 of the remaining 1179 were reexamined at 6 months, when collars were changed, yielding a 46.4% loss of follow up at 6 months.

** Adverse reactions included both cutaneous manifestations at the site of contact (erythema, pruritus, rashes, and wounds), as well as other clinical alterations that the owners reported were caused by the collar's use, such as vomiting, diarrhea, bleeding, and ocular alterations.
